# Supplementary material for: Role of Bacteria-Derived Flavins in Plant Growth Promotion and Phytochemical Accumulation in Leafy Vegetables
Source: MDPI journal article supplement (doi:10.3390/ijms241713311), 2023-08-28
Supplement: s1 [file s1]

**Table S1.** Effects of *S. meliloti* treatment on kale (*Brassica oleracea* var. *acephala*) growth, physiological, and yield parameters

| Treatment              | Number of leaves | Plant height (cm) | Stem diameter (mm) | Fv/F <sub>m</sub> | Fv/Fo         | Fresh weight (g) |
|------------------------|------------------|-------------------|--------------------|-------------------|---------------|------------------|
| FL <sup>+</sup> strain | 8 ± 1a           | 19.813 ± 1.6a     | 5.68 ± 0.7a        | 0.803 ± 0.01a     | 4.100 ± 0.16a | 19.0 ± 1.9a      |
| FL <sup>-</sup> strain | 8 ± 1a           | 19.750 ± 1.4a     | 5.18 ± 0.2ab       | 0.799 ± 0.01a     | 4.009 ± 0.17a | 17.75 ± 1.7a     |
| No inoculation         | 8 ± 1a           | 19.086 ± 1.5a     | 5.10 ± 0.4b        | 0.796 ± 0.01a     | 3.999 ± 0.29a | 17.93 ± 1.9a     |

*S. meliloti* 1021: FL<sup>+</sup> strain; *S. meliloti* 1021Δ*ribBA*: FL<sup>-</sup> strain; control: no inoculation. Fv/F<sub>m</sub>: maximum quantum efficiency of PSII and Fv/Fo: potential photosynthetic capacity. Different alphabetical letters denote significant differences ( $p < 0.05$ ) between treatment means by Fisher's least significant difference test.

**Table S2.** Effects of *S. meliloti* treatment on lettuce (*Lactuca sativa*) growth, physiological, and yield parameters

| Treatment              | Number of leaves | Plant height (cm) | Stem diameter (mm) | Fv/F <sub>m</sub> | Fv/Fo         | Fresh weight (g) |
|------------------------|------------------|-------------------|--------------------|-------------------|---------------|------------------|
| FL <sup>+</sup> strain | 9 ± 1a           | 20.83 ± 1.07a     | 7.51 ± 0.6a        | 0.808 ± 0.008a    | 4.217 ± 0.21a | 51.86 ± 2.6a     |
| FL <sup>-</sup> strain | 9 ± 1a           | 19.83 ± 1.25ab    | 7.35 ± 0.5ab       | 0.806 ± 0.007a    | 4.172 ± 0.18a | 49.33 ± 2.8a     |
| No inoculation         | 8 ± 1b           | 18.70 ± 1.30b     | 6.77 ± 0.7b        | 0.804 ± 0.007a    | 4.132 ± 0.18a | 41.17 ± 2.6b     |

*S. meliloti* 1021: FL<sup>+</sup> strain; *S. meliloti* 1021Δ*ribBA*: FL<sup>-</sup> strain; control: no inoculation. Fv/F<sub>m</sub>: maximum quantum efficiency of PSII and Fv/Fo: potential photosynthetic capacity. Different alphabetical letters denote significant differences ( $p < 0.05$ ) between treatment means by Fisher's least significant difference test.

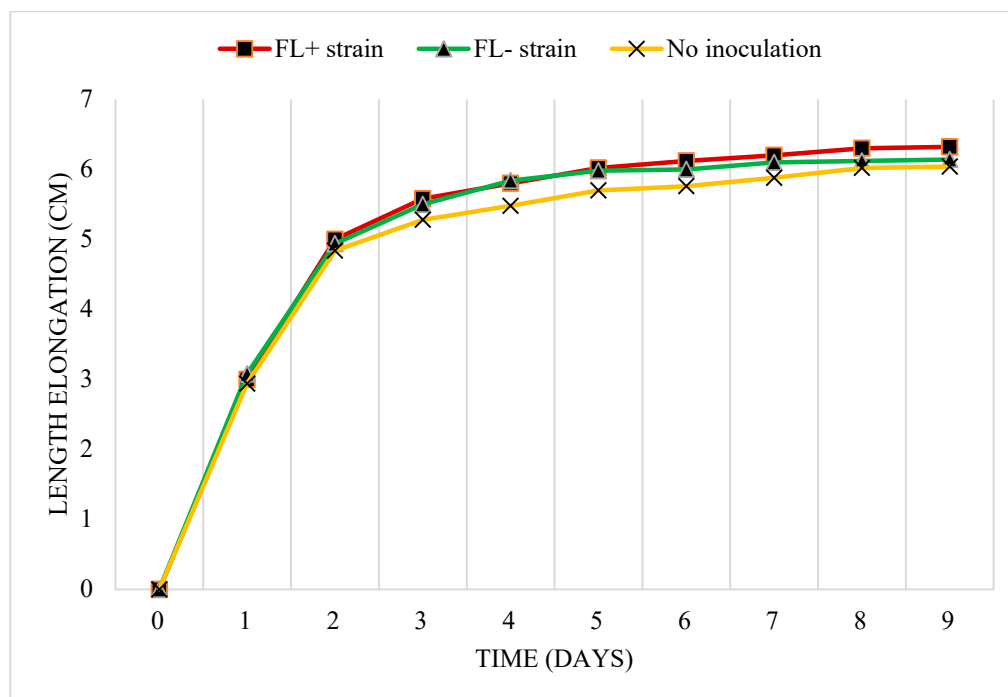

Figure S1. Effects of *S. meliloti* inoculation on kale (*Brassica oleracea* var. *acephala*) leaf elongation. *S. meliloti* 1021: FL+ strain; *S. meliloti* 1021 $\Delta$ ribBA: FL<sup>-</sup> strain; control: no inoculation.

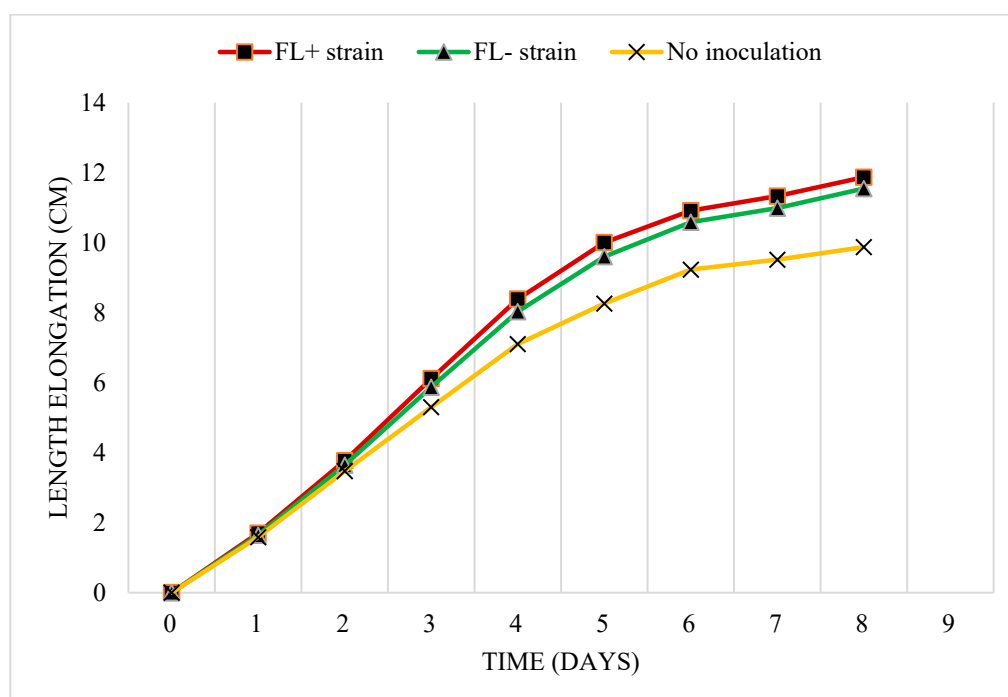

Figure S2. Effects of *S. meliloti* inoculation on lettuce (*Lactuca sativa*) leaf elongation. *S. meliloti* 1021: FL<sup>+</sup> strain; *S. meliloti* 1021 $\Delta$ ribBA: FL<sup>-</sup> strain; control: no inoculation.
